# Supplementary material for: Rising Inpatient Burden of Female Breast Cancer in Sri Lanka: A Population-Based Analysis of Hospital Admissions and Deaths, 2017–2022
Source: Research Square preprint supplement (doi:10.21203/rs.3.rs-6884857/v1), 2025-07-07
Supplement: Supplementary file 1 [file 7235fdc9fcadf8544e9c3def.docx]

**(S3) Supplementary Figure 1: Comparison of incidence and admissions of top 5 cancers in women**

2022 incidence data had not been published by the NCCP, Sri Lanka at the time of analysis.
