# Supplementary material for: Rising Inpatient Burden of Female Breast Cancer in Sri Lanka: A Population-Based Analysis of Hospital Admissions and Deaths, 2017–2022
Source: Research Square preprint supplement (doi:10.21203/rs.3.rs-6884857/v1), 2025-07-07
Supplement: Supplementary file 2 [file 7faedb7a0dfb7a21f63fd8b2.docx]

**(S4) Supplementary Table 3: Distribution of admissions by districts**

| **District** | **2017** | **2018** | **2019** | **2020** | **2021** | **2022** |
| --- | --- | --- | --- | --- | --- | --- |
| **Colombo** | 7019 | 8580 | 8463 | 8463 | 6097 | 7781 |
| **Kandy** | 1854 | 3736 | 4275 | 4275 | 3360 | 4194 |
| **Galle** | 3028 | 3028 | 3381 | 3381 | 3242 | 3625 |
| **Jaffna** | 756 | 934 | 1230 | 1230 | 642 | 1301 |
| **Matara** | 34 | 42 | 25 | 25 | 625 | 1084 |
| **Kurunegala** | 354 | 514 | 692 | 692 | 758 | 1040 |
| **Batticaloa** | 207 | 1935 | 1965 | 1965 | 20 | 901 |
| **Ratnapura** | 523 | 460 | 485 | 485 | 1158 | 894 |
| **Anuradhapura** | 662 | 1029 | 1097 | 1097 | 817 | 668 |
| **Gampaha** | 180 | 154 | 190 | 190 | 269 | 621 |
| **Badulla** | 631 | 737 | 733 | 733 | 426 | 563 |
| **Hambantota** | 23 | 29 | 74 | 74 | 525 | 440 |
| **Nuwara Eliya** | 78 | 103 | 114 | 114 | 197 | 360 |
| **Kalutara** | 97 | 97 | 203 | 203 | 155 | 219 |
| **Matale** | 47 | 42 | 41 | 41 | 66 | 109 |
| **Polonnaruwa** | 27 | 81 | 54 | 54 | 111 | 69 |
| **Ampara** | 13 | 38 | 42 | 42 | 150 | 64 |
| **Monaragala** | 43 | 66 | 104 | 104 | 89 | 61 |
| **Puttalam** | 34 | 26 | 32 | 32 | 48 | 56 |
| **Kegalle** | 40 | 40 | 47 | 47 | 42 | 39 |
| **Trincomalee** | 82 | 91 | 121 | 121 | 39 | 31 |
| **Mannar** | 11 | 7 | 2 | 2 | 7 | 15 |
| **Mullaitivu** | 4 | 9 | 4 | 4 | 12 | 12 |
| **Kilinochchi** | 111 | 83 | 106 | 106 | 31 | 6 |
| **Vavuniya** | 7 | 11 | 11 | 11 | 23 | 5 |
| **Total** | 15865 | 21872 | 23491 | 23491 | 18909 | 24158 |
|  |  |  |  |  |  |  |
