# Supplementary material for: Rising Inpatient Burden of Female Breast Cancer in Sri Lanka: A Population-Based Analysis of Hospital Admissions and Deaths, 2017–2022
Source: Research Square preprint supplement (doi:10.21203/rs.3.rs-6884857/v1), 2025-07-07
Supplement: Supplementary file 3 [file 85a96cebe0ab4899bf516d75.docx]

**(S2) Supplementary Table 2: Sex distribution of breast cancer incidence and hospital admissions**

| Year | 2017 | 2018 | 2019 | 2020 | 2021 | 2022 |
| --- | --- | --- | --- | --- | --- | --- |
| Breast cancer incidencea | | | | | | |
| Both sexes | 4336 | 3914 | 4560 | 5329 | 5609 | * |
| Female | 4193 | 3778 | 4447 | 5189 | 5485 | * |
| Breast cancer admissionsb |  |  |  |  |  |  |
| Total admissions | 16148 | 22424 | 23951 | 20392 | 19460 | 24847 |
| Female admissions | 15865 | 21872 | 23491 | 19983 | 18909 | 24158 |
| Male admissions | 283 | 552 | 460 | 409 | 551 | 689 |
| Percentage of female admissions | 98.25% | 97.54% | 98.08% | 97.99% | 97.17% | 97.23% |

a- NCCP Sri Lanka(10)(11)(12)(13)(14); b- eIMMR system

*Data not published by the NCCP, Sri Lanka at the time of analysis.
