# Supplementary material for: Rising Inpatient Burden of Female Breast Cancer in Sri Lanka: A Population-Based Analysis of Hospital Admissions and Deaths, 2017–2022
Source: Research Square preprint supplement (doi:10.21203/rs.3.rs-6884857/v1), 2025-07-07
Supplement: Supplementary file 4 [file 893c321b84070462e10de90a.docx]

**(S1) Supplementary Table 1: ICD codes for each neoplasm site**

| Site of Neoplasm | ICD codes |
| --- | --- |
| Breast | C50, C50.0, C50.1, C50.2, C50.3, C50.4, C50.5, C50.6, C60.8, C50.9, D05.1 |
| Thyroid | C73 |
| Colorectal | C18, C18.0, C18.1, C18.2, C18.3, C18.4, C18.5, C18.6, C18.7, C18.8, C18.9, C19, C20, D01.0, D01.1, D01,2 |
| Cervix uteri | C53, C53.0, C53.1, C53.8, C53.9, D06, D06.0, D06.1, D06.7, D06.9 |
| Ovarian | C56 |
